# Supplementary material for: Pseudogene RPL32P3 regulates the blood–tumor barrier permeability via the YBX2/HNF4G axis
Source: PubMed Central journal article supplement (PMC8613260; doi:10.1038/s41420-021-00758-9), 2021-11-24
Supplement: 41420_2021_758_MOESM9_ESM.pdf [file 41420_2021_758_MOESM9_ESM.pdf]

Please complete the table below to indicate the contributions of all named authors to the figures.

Figure 1:

Y.D., X.L., C.Y., X.R., D.W., Q.L., L.Z., and X.S. generated the data, Y.D. assembled the figure.

Figure 2:

Y.D., X.L., C.Y., X.R., D.W., Q.L., L.Z., and X.S. generated the data, Y.D. assembled the figure.

Figure 3:

X.L., C.Y., and S.S. generated the data, Y.D. assembled the figure.

Figure 4:

Y.D., X.L., C.Y., X.R., D.W., and X.S. generated the data, Y.D. assembled the figure.

Figure 5:

Y.D., X.L., C.Y., X.R., D.W., and X.S. generated the data, Y.D. assembled the figure.

Figure 6:

Y.D., X.L., C.Y., X.R., D.W., and X.S. generated the data, Y.D. assembled the figure.

Signed for and on behalf of the Author(s):

Print Name:

Xue Yixue

Date:

2021.10.25
